# Supplementary material
Source: Research Square preprint supplement (doi:10.21203/rs.3.rs-9548265/v1)
Supplement: Supplementary file 1 [file 283599cf9f97ea66c8ded6a4.docx]

**Supplementary Document 1**

**Contents**

[**1 A brief summary of the two cohorts** 3](#_Toc227932983)

[**2 Construction of the Markov model and multi-state life table** 4](#_Toc227932984)

[2.1 Multi-state model framework 4](#_Toc227932985)

[2.2 Estimation of state transition probabilities 5](#_Toc227932986)

[2.3 Overall weighting 6](#_Toc227932987)

[2.4 Multi-state life-table recursion and specification of initial states 6](#_Toc227932988)

[2.5 Calculation of remaining life expectancy 7](#_Toc227932989)

[**3 Supplementary results** 9](#_Toc227932990)

[3.1 Table S1. Life expectancy and state-specific life expectancy among individuals aged 60–85 years in the CHARLS analysis, stratified by sex. 9](#_Toc227932991)

[3.2 Table S2. Life expectancy and state-specific life expectancy among individuals aged 60–85 years in the CHARLS analysis, stratified by education level. 11](#_Toc227932992)

[3.3 Table S3. Life expectancy at age 60 in the CHARLS population, stratified jointly by sex and educational level. 13](#_Toc227932993)

[3.4 Table S4. Total life expectancy and state-specific life expectancy at age 60 by baseline depression status in the HRS population. 14](#_Toc227932994)

[3.5 Table S5. Life expectancy and state-specific life expectancy among individuals with a starting age of 60 years in the HRS analysis. 15](#_Toc227932995)

[3.6 Table S6. Life expectancy and state-specific life expectancy among individuals with a starting age of 60 years in the HRS analysis, stratified by sex. 16](#_Toc227932996)

[3.7 Table S7. Life expectancy and state-specific life expectancy among individuals with a starting age of 60 years in the HRS analysis, stratified by education. 17](#_Toc227932997)

[3.8 Table S8. Total life expectancy and state-specific life expectancy at age 60 by baseline depression status in the HRS sensitivity analysis. 18](#_Toc227932998)

[3.9 Table S9. Life expectancy and state-specific life expectancy among individuals with a starting age of 60 years in the HRS sensitivity analysis. 19](#_Toc227932999)

[3.10 Figure S1. Transition probability plot of depression-related health states among older adults with arthritis in the HRS population. 21](#_Toc227933000)

[3.11 Figure S2. Composition of state-specific life expectancy among older adults with arthritis in the HRS analysis, stratified by sex and educational level. 22](#_Toc227933001)

# 1 A brief summary of the two cohorts

**The China Health and Retirement Longitudinal Study (CHARLS)**

CHARLS is a nationally representative longitudinal survey of adults aged 45 years and older and their spouses in China mainland. Similar to other aging surveys, it assesses social, economic, and health circumstances of community-residents. CHARLS initiated between June 2011 and March 2012 and involved 17708 respondents from 150 counties within in 28 provinces at baseline. Data collection is conducted at every 2-year follow-up. The CHARLS was approved by the Biomedical Ethics Review Committee of Peking University (IRB00001052-14010). All participants provided written informed content.

**The Health and Retirement Study (HRS)**

HRS is conducted by the Institute for Social Research at the University of Michigan with funding from the National Institute on Aging (grant number NIA U01AG009740) and the Social Security Administration. It is a nationally representative longitudinal aging survey of more than 37000 individuals over age 50 in 23000 households in the USA. The HRS was initiated in 1992 and was followed every 2 years since then. Since 2006, a self-administered questionnaire has been utilized to obtain information about participants’ evaluations of their circumstances, subjective wellbeing, and lifestyle, including social participation and loneliness. This psychosocial and lifestyle questionnaire is obtained in each biennial wave from a rotating (random) 50% of the core panel participants who complete the enhanced face-to-face interview. Although the psychosocial questionnaire is administered to rotating half-samples, transition records in the present analysis were constructed according to the available adjacent observation intervals used in the analytic dataset. The latest ethical approval for HRS was obtained from the University of Michigan Institutional Review Board (IRB Protocol: HUM0061128).

# 2 Construction of the Markov model and multi-state life table

## 2.1 Multi-state model framework

This study used a discrete-time multi-state Markov model to describe changes in depression status among individuals with arthritis during follow-up. At each observation time point, each individual could be in one of four mutually exclusive states: State 1, no depression; State 2, mild depression; State 3, moderate-to-severe depression; and State 4, death. Death was defined as an absorbing state. Once an individual entered the death state, no further transitions were allowed.

In both cohorts, depression status was classified into three non-death states, together with death, resulting in four states in total. In CHARLS, depression status was defined based on the CESD-10 score. In HRS, depression status was defined based on the CES-D 8 score: scores of 0–1 were classified as no depression, scores of 2–3 as mild depression, and scores of 4–8 as moderate-to-severe depression. Death status was determined using mortality information collected during follow-up. To ensure consistency in transition definitions, individuals who died between two adjacent observations were assigned to the death state at the next observation time point. Once an individual entered the death state, subsequent non-death transitions were no longer included in the transition modeling.

This study adopted the first-order Markov assumption. That is, conditional on the current state and covariates, the state at the next observation time point depends only on the current state and not on earlier state history. Let the conditional probability that an individual transitions from state *i* at age *a* to state *j* at the next observation time point be:

Here, *Δ* denotes the time interval between two adjacent observations. The objective was to estimate age-specific state transition probability matrices. These matrices were then used to construct multi-state life tables and to further calculate total remaining life expectancy (life expectancy, LE) and state-specific remaining life expectancy. The latter included depression-free life expectancy (DFLE), mild depression life expectancy (MDLE), and moderate-to-severe depression life expectancy (SDLE).

For each individual, all valid observations were arranged in chronological order. If an individual was in state *i* at one observation time point and in state *j* at the next observation time point, this was recorded as a transition from state *i* to state *j*. The starting age, time interval, and covariate information were retained for each transition record.

## 2.2 Estimation of state transition probabilities

For each non-death starting state, namely States 1, 2, and 3, a separate multinomial logit regression model was fitted to estimate the probability of transitioning to each target state, including death, at the next observation time point. Age, sex, and educational level were included as covariates. Because death was an absorbing state, multinomial logit models were fitted only for starting States 1–3. No subsequent transition model was specified for State 4.

In CHARLS, age was included as a continuous variable and modeled using natural splines to account for potential nonlinear associations between age and state transitions. Because CHARLS included both 2-year and 3-year observation intervals, state transition probability matrices were estimated separately for the 2-year and 3-year intervals, denoted as:

Where denotes the state transition probability matrix at age for the 2-year interval, and denotes the corresponding transition probability matrix for the 3-year interval. To maintain consistency with the observation structure of the empirical data, empirical weights were further used to combine these two matrices and construct a mixed-interval transition probability matrix:

In the analysis, and were estimated according to the empirical distribution of 2-year and 3-year observation intervals in the sample. This approach allowed the transition probability matrix used in the life-table recursion to better reflect the actual follow-up structure of CHARLS.

In HRS, transition records were constructed using a fixed 2-year interval between adjacent waves. Therefore, only one state transition probability matrix with a unified time step needed to be estimated:

## 2.3 Overall weighting

The overall results in this study were not obtained by directly averaging predictions across the full sample. Instead, state transition probabilities were first estimated separately within sex-by-education subgroups, and were then weighted according to the empirical composition of the sample within the target age window.

Let the four subgroups be female with low education, female with high education, male with low education, and male with high education. The age-specific transition probability matrix for subgroup is denoted as , and the corresponding composition weight is denoted as . The overall transition probability matrix can then be expressed as:

In CHARLS, composition weights were estimated using the 60–63-year age window. In HRS, composition weights were estimated using the 60–62-year age window. This approach was intended to ensure that the overall results more closely reflected the actual sociodemographic composition of the sample around the target age, and to avoid excessive dependence of the overall predictions on a single reference covariate profile.

## 2.4 Multi-state life-table recursion and specification of initial states

Multi-state life-table analysis requires specifying the initial state distribution at the starting age for life expectancy estimation. To compare subsequent life expectancy composition across different baseline depression states, this study primarily used age 60 as the common starting point and specified the following three initial states:

These initial states represent individuals who were in the no depression, mild depression, and moderate-to-severe depression states at age 60, respectively. Based on these three starting states, total remaining life expectancy and state-specific life expectancy were calculated separately. Because death was an absorbing state and had no meaningful subsequent life expectancy to be recursively estimated, it was not used as a starting state for life expectancy estimation.

Let the state distribution vector at age be:

Given the age-specific transition probability matrix , the state distribution at the next time step can be recursively updated as:

In CHARLS, the combined transition probability matrix was used. In HRS, the transition probability matrix under the fixed 2-year step, , was used. This study used age 60 as the starting point for life expectancy estimation and recursively projected the state distribution up to age 100. This procedure yielded the occupancy probabilities for each state across different ages.

## 2.5 Calculation of remaining life expectancy

Let denote the occupancy probability of state during the recursive process from the starting age to the terminal age . The remaining life expectancy in state can then be expressed as:

Where State 1 corresponds to depression-free life expectancy (DFLE), State 2 corresponds to mild depression life expectancy (MDLE), and State 3 corresponds to moderate-to-severe depression life expectancy (SDLE).

Total remaining life expectancy was defined as the sum of life expectancy across the three non-death states:

In addition, this study further calculated the proportion of each state-specific life expectancy in total remaining life expectancy, namely DFLE/LE, MDLE/LE, and SDLE/LE. These proportions were used to describe the health composition of remaining life expectancy.

It should be noted that the age at sample inclusion and the starting age for life expectancy estimation are not the same concept. During model fitting, valid transition information before individuals entered the target age window could be used to improve the stability of state transition probability estimation. However, all life expectancy indicators were uniformly interpreted as “remaining life expectancy from age 60”.

In CHARLS, individuals were not required to be aged 60 years or older at the baseline survey. Those who entered the target age range during subsequent follow-up and contributed valid transition information could be included in the state transition model. A similar approach was applied in HRS. Therefore, the life expectancy indicators reported in this study should be interpreted as estimates of remaining life expectancy using age 60 as the common starting point, rather than estimates restricted only to participants who were already aged 60 years or older at baseline. In both cohorts, multi-state life-table recursion was performed over the age range of 60–100 years.

# 3 Supplementary results

## 3.1 Table S1. Life expectancy and state-specific life expectancy among individuals aged 60–85 years in the CHARLS analysis, stratified by sex.

| **Table S1.** Remaining life expectancy and state-specific life expectancy among individuals aged 60–85 years in the CHARLS analysis, stratified by sex. | | | | | | | | | |
| --- | --- | --- | --- | --- | --- | --- | --- | --- | --- |
| Age | Female |  |  |  |  | Male |  |  |  |
| LE (year) | DFLE (year) | MDLE (year) | SDLE (year) |  | LE (year) | DFLE (year) | MDLE (year) | SDLE (year) |
| 60 | 21.45 (20.23–22.91) | 9.83 (8.95–10.73) | 5.01 (4.58–5.61) | 6.61 (6.05–7.35) |  | 18.51 (17.56–19.58) | 11.46 (10.66–12.35) | 3.54 (3.23–3.94) | 3.52 (3.11–3.94) |
| 61 | 20.51 (19.30–21.91) | 9.39 (8.50–10.29) | 4.79 (4.38–5.36) | 6.33 (5.78–7.07) |  | 17.77 (16.93–18.84) | 10.94 (10.22–11.77) | 3.40 (3.12–3.81) | 3.43 (3.00–3.88) |
| 62 | 19.69 (18.46–21.15) | 9.00 (8.16–9.90) | 4.57 (4.14–5.11) | 6.11 (5.58–6.87) |  | 16.86 (16.09–17.89) | 10.39 (9.66–11.20) | 3.23 (2.95–3.63) | 3.23 (2.81–3.66) |
| 63 | 18.72 (17.58–20.05) | 8.54 (7.76–9.43) | 4.34 (3.90–4.84) | 5.84 (5.31–6.57) |  | 16.02 (15.28–17.02) | 9.83 (9.13–10.63) | 3.11 (2.83–3.50) | 3.09 (2.67–3.54) |
| 64 | 17.93 (16.88–19.34) | 8.16 (7.38–9.03) | 4.18 (3.75–4.72) | 5.60 (5.08–6.33) |  | 15.06 (14.34–16.08) | 9.23 (8.57–10.04) | 2.93 (2.67–3.31) | 2.90 (2.53–3.33) |
| 65 | 17.05 (15.94–18.35) | 7.65 (6.88–8.49) | 4.02 (3.61–4.57) | 5.38 (4.83–6.03) |  | 14.20 (13.49–15.19) | 8.65 (8.04–9.39) | 2.79 (2.52–3.16) | 2.76 (2.39–3.19) |
| 66 | 16.29 (15.17–17.64) | 7.28 (6.49–8.10) | 3.87 (3.46–4.46) | 5.14 (4.62–5.80) |  | 13.43 (12.75–14.45) | 8.10 (7.50–8.86) | 2.66 (2.41–3.04) | 2.67 (2.31–3.10) |
| 67 | 15.35 (14.16–16.63) | 6.79 (6.02–7.65) | 3.65 (3.24–4.21) | 4.91 (4.38–5.57) |  | 12.60 (11.90–13.59) | 7.54 (6.97–8.33) | 2.52 (2.26–2.89) | 2.53 (2.19–2.92) |
| 68 | 14.52 (13.36–15.94) | 6.52 (5.76–7.39) | 3.40 (2.99–3.97) | 4.59 (4.07–5.25) |  | 11.84 (11.13–12.83) | 6.99 (6.38–7.78) | 2.40 (2.15–2.78) | 2.46 (2.13–2.85) |
| 69 | 13.73 (12.63–15.12) | 6.18 (5.44–7.00) | 3.21 (2.79–3.75) | 4.34 (3.83–5.01) |  | 11.03 (10.32–11.98) | 6.50 (5.94–7.26) | 2.22 (1.97–2.58) | 2.31 (1.96–2.73) |
| 70 | 13.00 (11.91–14.36) | 5.92 (5.18–6.72) | 3.02 (2.61–3.58) | 4.06 (3.52–4.74) |  | 10.28 (9.55–11.23) | 6.03 (5.47–6.80) | 2.07 (1.82–2.42) | 2.17 (1.84–2.60) |
| 71 | 12.12 (11.02–13.45) | 5.52 (4.76–6.32) | 2.87 (2.45–3.40) | 3.73 (3.21–4.40) |  | 9.55 (8.84–10.56) | 5.66 (5.11–6.43) | 1.91 (1.64–2.25) | 1.98 (1.65–2.36) |
| 72 | 11.31 (10.28–12.60) | 5.21 (4.39–5.97) | 2.67 (2.22–3.20) | 3.44 (2.93–4.10) |  | 8.92 (8.19–9.96) | 5.36 (4.78–6.11) | 1.79 (1.53–2.15) | 1.77 (1.44–2.15) |
| 73 | 10.48 (9.44–11.73) | 4.86 (4.09–5.61) | 2.51 (2.07–3.03) | 3.11 (2.66–3.70) |  | 8.31 (7.59–9.36) | 5.01 (4.38–5.79) | 1.67 (1.41–2.01) | 1.63 (1.32–2.00) |
| 74 | 9.93 (8.87–11.16) | 4.56 (3.71–5.37) | 2.38 (1.92–2.93) | 3.00 (2.55–3.64) |  | 7.84 (7.05–8.86) | 4.80 (4.18–5.61) | 1.52 (1.27–1.88) | 1.51 (1.24–1.89) |
| 75 | 9.14 (8.07–10.49) | 4.11 (3.30–4.94) | 2.19 (1.74–2.76) | 2.84 (2.38–3.46) |  | 7.15 (6.37–8.08) | 4.33 (3.68–5.12) | 1.38 (1.11–1.71) | 1.45 (1.13–1.84) |
| 76 | 8.41 (7.33–9.80) | 3.79 (2.99–4.69) | 2.07 (1.60–2.61) | 2.55 (2.06–3.16) |  | 6.70 (5.93–7.68) | 4.05 (3.37–4.88) | 1.35 (1.08–1.68) | 1.31 (0.99–1.68) |
| 77 | 7.78 (6.73–9.09) | 3.59 (2.73–4.44) | 1.90 (1.43–2.44) | 2.29 (1.81–2.87) |  | 6.12 (5.32–7.04) | 3.58 (2.88–4.35) | 1.29 (0.99–1.62) | 1.26 (0.95–1.61) |
| 78 | 7.13 (6.01–8.48) | 3.42 (2.51–4.35) | 1.70 (1.21–2.25) | 2.01 (1.57–2.63) |  | 5.66 (4.82–6.77) | 3.38 (2.60–4.24) | 1.21 (0.89–1.55) | 1.08 (0.80–1.42) |
| 79 | 6.81 (5.66–8.18) | 3.47 (2.46–4.54) | 1.45 (0.99–2.05) | 1.88 (1.41–2.46) |  | 5.13 (4.28–6.25) | 3.14 (2.40–4.00) | 1.01 (0.71–1.38) | 0.97 (0.71–1.37) |
| 80 | 6.12 (4.90–7.59) | 3.07 (2.02–4.19) | 1.38 (0.86–1.99) | 1.68 (1.21–2.24) |  | 4.56 (3.78–5.84) | 2.85 (2.11–3.87) | 0.88 (0.58–1.30) | 0.84 (0.57–1.22) |
| 81 | 5.86 (4.56–7.56) | 3.11 (1.95–4.47) | 1.35 (0.82–1.98) | 1.39 (0.93–1.96) |  | 4.31 (3.55–5.75) | 2.64 (1.87–3.71) | 0.90 (0.61–1.30) | 0.77 (0.51–1.18) |
| 82 | 5.38 (4.09–6.92) | 2.75 (1.69–3.95) | 1.29 (0.75–1.98) | 1.33 (0.91–1.94) |  | 4.04 (3.12–5.46) | 2.51 (1.64–3.78) | 0.85 (0.52–1.28) | 0.68 (0.41–1.11) |
| 83 | 5.11 (3.76–6.66) | 2.94 (1.65–4.14) | 1.08 (0.62–1.80) | 1.09 (0.62–1.61) |  | 3.84 (2.83–5.34) | 2.39 (1.43–3.62) | 0.86 (0.55–1.32) | 0.59 (0.34–1.05) |
| 84 | 4.12 (2.77–5.84) | 2.29 (1.23–3.46) | 0.80 (0.39–1.49) | 1.02 (0.55–1.60) |  | 3.39 (2.31–4.99) | 2.16 (1.27–3.38) | 0.69 (0.35–1.13) | 0.54 (0.28–1.00) |
| 85 | 3.15 (1.76–4.86) | 1.78 (0.69–3.16) | 0.54 (0.22–1.12) | 0.83 (0.40–1.40) |  | 3.24 (2.09–4.82) | 1.98 (0.97–3.34) | 0.65 (0.35–1.15) | 0.61 (0.33–1.12) |
| Values in parentheses are 95% confidence intervals (CIs). | | | | | | | | | |

LE, life expectancy, DFLE, depression-free life expectancy, MDLE, mild-depression life expectancy, SDLE, moderate-to-severe depression life expectancy.

## 3.2 Table S2. Life expectancy and state-specific life expectancy among individuals aged 60–85 years in the CHARLS analysis, stratified by education level.

| **Table S2.** Remaining life expectancy and state-specific life expectancy among individuals aged 60–85 years in the CHARLS analysis, stratified by education level. | | | | | | | | | |
| --- | --- | --- | --- | --- | --- | --- | --- | --- | --- |
| Age | lower education |  |  |  |  | higher education |  |  |  |
| LE (year) | DFLE (year) | MDLE (year) | SDLE (year) |  | LE (year) | DFLE (year) | MDLE (year) | SDLE (year) |
| 60 | 19.69 (18.93–20.53) | 10.02 (9.42–10.65) | 4.40 (4.07–4.77) | 5.28 (4.84–5.76) |  | 25.17 (21.29–31.52) | 15.90 (12.58–20.85) | 4.12 (2.86–6.05) | 5.15 (3.45–7.62) |
| 61 | 18.87 (18.15–19.74) | 9.59 (9.01–10.25) | 4.21 (3.93–4.61) | 5.07 (4.67–5.54) |  | 23.95 (20.15–30.30) | 15.34 (12.08–20.05) | 3.83 (2.63–5.58) | 4.77 (3.14–7.11) |
| 62 | 18.06 (17.33–18.91) | 9.24 (8.66–9.90) | 4.00 (3.72–4.34) | 4.82 (4.43–5.30) |  | 22.90 (18.97–29.47) | 14.65 (11.40–19.46) | 3.59 (2.39–5.46) | 4.66 (3.06–7.17) |
| 63 | 17.21 (16.46–18.06) | 8.81 (8.23–9.46) | 3.80 (3.52–4.14) | 4.60 (4.20–5.09) |  | 21.76 (17.89–28.09) | 14.16 (10.90–18.74) | 3.39 (2.29–5.11) | 4.20 (2.70–6.54) |
| 64 | 16.36 (15.63–17.20) | 8.38 (7.81–9.00) | 3.62 (3.33–3.98) | 4.37 (3.99–4.83) |  | 21.26 (17.45–27.46) | 13.72 (10.38–18.40) | 3.41 (2.24–5.20) | 4.13 (2.74–6.42) |
| 65 | 15.55 (14.78–16.37) | 7.89 (7.33–8.49) | 3.46 (3.17–3.84) | 4.19 (3.81–4.65) |  | 20.39 (16.81–26.35) | 13.20 (10.11–17.78) | 3.36 (2.25–5.13) | 3.83 (2.50–5.93) |
| 66 | 14.79 (14.02–15.68) | 7.46 (6.92–8.11) | 3.32 (3.01–3.70) | 4.00 (3.61–4.46) |  | 19.44 (15.70–25.76) | 12.41 (9.40–17.08) | 3.11 (2.03–4.97) | 3.92 (2.53–6.12) |
| 67 | 13.91 (13.12–14.79) | 6.96 (6.43–7.63) | 3.14 (2.84–3.51) | 3.81 (3.42–4.23) |  | 18.26 (14.77–24.42) | 11.95 (8.95–16.51) | 2.73 (1.91–4.42) | 3.58 (2.21–5.71) |
| 68 | 13.09 (12.34–14.00) | 6.58 (6.05–7.27) | 2.93 (2.64–3.31) | 3.57 (3.17–4.02) |  | 17.22 (13.24–23.66) | 11.11 (7.95–15.90) | 2.59 (1.70–4.30) | 3.53 (2.24–5.70) |
| 69 | 12.27 (11.50–13.14) | 6.15 (5.63–6.80) | 2.74 (2.44–3.09) | 3.37 (3.00–3.81) |  | 16.81 (13.41–22.58) | 10.94 (7.95–15.21) | 2.56 (1.71–4.05) | 3.31 (2.04–5.49) |
| 70 | 11.51 (10.77–12.39) | 5.81 (5.23–6.47) | 2.56 (2.26–2.91) | 3.13 (2.73–3.59) |  | 16.19 (12.65–21.90) | 10.36 (7.50–14.69) | 2.44 (1.57–4.07) | 3.39 (2.11–5.64) |
| 71 | 10.69 (9.93–11.61) | 5.41 (4.82–6.06) | 2.41 (2.11–2.76) | 2.87 (2.49–3.32) |  | 15.94 (12.76–21.22) | 10.32 (7.41–14.30) | 2.36 (1.55–3.96) | 3.26 (1.92–5.50) |
| 72 | 9.99 (9.25–10.93) | 5.09 (4.50–5.74) | 2.26 (1.95–2.61) | 2.65 (2.28–3.08) |  | 14.62 (11.38–20.26) | 9.79 (7.12–13.95) | 2.11 (1.30–3.67) | 2.72 (1.68–4.64) |
| 73 | 9.26 (8.47–10.25) | 4.75 (4.12–5.43) | 2.11 (1.80–2.46) | 2.40 (2.04–2.85) |  | 13.69 (10.64–19.03) | 9.14 (6.67–13.22) | 1.98 (1.19–3.38) | 2.57 (1.58–4.38) |
| 74 | 8.69 (7.93–9.66) | 4.49 (3.84–5.21) | 1.95 (1.64–2.32) | 2.25 (1.93–2.68) |  | 12.70 (9.73–18.20) | 8.44 (5.91–12.59) | 1.92 (1.24–3.43) | 2.34 (1.42–4.11) |
| 75 | 7.91 (7.15–8.90) | 4.07 (3.41–4.84) | 1.76 (1.44–2.12) | 2.08 (1.73–2.52) |  | 12.44 (9.81–17.33) | 7.57 (5.13–11.38) | 2.06 (1.28–3.60) | 2.81 (1.56–4.72) |
| 76 | 7.28 (6.45–8.31) | 3.75 (3.11–4.52) | 1.67 (1.33–2.02) | 1.87 (1.54–2.28) |  | 11.82 (9.26–16.88) | 7.33 (4.97–11.19) | 2.11 (1.36–3.86) | 2.38 (1.21–4.35) |
| 77 | 6.70 (5.84–7.73) | 3.42 (2.78–4.15) | 1.56 (1.21–1.93) | 1.73 (1.37–2.12) |  | 11.39 (8.67–16.08) | 6.78 (4.25–10.43) | 2.12 (1.21–3.82) | 2.49 (1.46–4.24) |
| 78 | 6.11 (5.19–7.14) | 3.19 (2.49–3.97) | 1.42 (1.07–1.83) | 1.49 (1.16–1.88) |  | 10.72 (8.15–15.44) | 6.80 (4.17–10.64) | 1.77 (0.92–3.33) | 2.15 (1.15–3.96) |
| 79 | 5.67 (4.74–6.70) | 3.09 (2.37–3.82) | 1.21 (0.87–1.61) | 1.37 (1.06–1.77) |  | 9.43 (6.49–14.23) | 6.22 (3.67–9.91) | 1.33 (0.67–2.83) | 1.88 (1.07–3.44) |
| 80 | 5.12 (4.21–6.34) | 2.79 (2.04–3.66) | 1.12 (0.73–1.54) | 1.21 (0.92–1.63) |  | 7.63 (4.57–12.87) | 5.44 (2.80–9.64) | 0.88 (0.42–2.16) | 1.32 (0.45–2.96) |
| 81 | 4.81 (3.90–6.01) | 2.69 (1.89–3.53) | 1.10 (0.72–1.51) | 1.02 (0.72–1.45) |  | 6.95 (3.57–12.08) | 4.77 (2.07–8.83) | 0.97 (0.34–2.29) | 1.21 (0.38–2.57) |
| 82 | 4.49 (3.52–5.71) | 2.46 (1.64–3.39) | 1.06 (0.66–1.54) | 0.97 (0.66–1.40) |  | 6.97 (3.36–11.93) | 4.96 (1.70–9.37) | 0.98 (0.28–2.42) | 1.03 (0.31–2.49) |
| 83 | 4.11 (3.11–5.33) | 2.40 (1.49–3.41) | 0.94 (0.59–1.43) | 0.76 (0.46–1.15) |  | 7.46 (5.00–11.30) | 5.32 (2.45–9.01) | 1.04 (0.34–2.44) | 1.10 (0.35–2.56) |
| 84 | 3.54 (2.52–4.81) | 2.00 (1.19–2.99) | 0.76 (0.43–1.28) | 0.78 (0.45–1.22) |  | 6.05 (2.32–11.23) | 4.96 (1.94–9.31) | 0.52 (0.08–1.54) | 0.57 (0.09–1.61) |
| 85 | 3.05 (1.98–4.37) | 1.76 (0.92–2.98) | 0.61 (0.32–1.09) | 0.67 (0.39–1.06) |  | 5.10 (0.00–9.89) | 3.51 (0.00–7.91) | 0.55 (0.00–1.55) | 1.04 (0.00–2.84) |
| Values in parentheses are 95% confidence intervals (CIs) | | | |  |  |  |  |  |  |

LE, life expectancy, DFLE, depression-free life expectancy, MDLE, mild-depression life expectancy, SDLE, moderate-to-severe depression life expectancy.

## 3.3 Table S3. Life expectancy at age 60 in the CHARLS population, stratified jointly by sex and educational level.

| **Table S3.** Life expectancy at age 60 in the CHARLS population, stratified jointly by sex and educational level. | | | | | | | | | | | | | | | | | | | |
| --- | --- | --- | --- | --- | --- | --- | --- | --- | --- | --- | --- | --- | --- | --- | --- | --- | --- | --- | --- |
| Health State | Female, lower education | | | |  | Female, higher education | | | |  | Male, lower education | | | |  | Male, higher education | | | |
| LE  (year) | DFLE  (year) | MDLE  (year) | SDLE  (year) |  | LE  (year) | DFLE  (year) | MDLE  (year) | SDLE  (year) |  | LE  (year) | DFLE  (year) | MDLE  (year) | SDLE  (year) |  | LE  (year) | DFLE  (year) | MDLE  (year) | SDLE  (year) |
| No depression | 21.51 | 11.38 | 4.49 | 5.64 |  | 27.10 | 16.76 | 4.28 | 6.06 |  | 18.36 | 12.27 | 3.15 | 2.95 |  | 23.71 | 17.73 | 2.85 | 3.13 |
| Mild depression | 21.41 | 8.62 | 6.69 | 6.10 |  | 27.07 | 13.6 | 6.61 | 6.86 |  | 18.32 | 9.65 | 5.38 | 3.29 |  | 23.74 | 14.85 | 5.19 | 3.70 |
| Moderate-to-severe depression | 20.97 | 7.73 | 4.57 | 8.67 |  | 26.81 | 12.87 | 4.69 | 9.25 |  | 17.79 | 8.33 | 3.41 | 6.05 |  | 23.41 | 13.73 | 3.39 | 6.29 |

LE, life expectancy, DFLE, depression-free life expectancy, MDLE, mild-depression life expectancy, SDLE, moderate-to-severe depression life expectancy.

## 3.4 Table S4. Total life expectancy and state-specific life expectancy at age 60 by baseline depression status in the HRS population.

| **Table S4.** Total life expectancy and state-specific life expectancy at age 60 by baseline depression status in the HRS population. | | | | | | | |
| --- | --- | --- | --- | --- | --- | --- | --- |
| Health State | LE(year) | DFLE(year) | MDLE(year) | SDLE(year) | DFLE/LE | MDLE/LE | SDLE/LE |
| No depression | 35.17 | 23.23 | 6.79 | 5.15 | 0.67 | 0.19 | 0.14 |
| Mild depression | 35.03 | 20.74 | 8.38 | 5.91 | 0.59 | 0.24 | 0.17 |
| Moderate-to-severe depression | 34.85 | 19.35 | 7.26 | 8.24 | 0.55 | 0.21 | 0.24 |

LE, life expectancy, DFLE, depression-free life expectancy, MDLE, mild-depression life expectancy, SDLE, moderate-to-severe depression life expectancy.

## 3.5 Table S5. Life expectancy and state-specific life expectancy among individuals with a starting age of 60 years in the HRS analysis.

| **Table S5.** Life expectancy and state-specific life expectancy among individuals with a starting age of 60 years in the HRS population. | | | | | | | |
| --- | --- | --- | --- | --- | --- | --- | --- |
| Age | LE (year) | DFLE (year) | MDLE (year) | SDLE (year) | DFLE/LE | MDLE/LE | SDLE/LE |
| 60 | 35.16 | 23.23 | 6.79 | 5.15 | 0.66 | 0.19 | 0.15 |
| 61 | 33.66 | 22.27 | 6.49 | 4.9 | 0.66 | 0.19 | 0.15 |
| 62 | 33.24 | 21.97 | 6.45 | 4.83 | 0.66 | 0.19 | 0.15 |
| 63 | 31.75 | 21.02 | 6.15 | 4.58 | 0.66 | 0.19 | 0.14 |
| 64 | 31.34 | 20.72 | 6.11 | 4.51 | 0.66 | 0.19 | 0.14 |
| 65 | 29.85 | 19.78 | 5.81 | 4.26 | 0.66 | 0.19 | 0.14 |
| 66 | 29.44 | 19.49 | 5.77 | 4.19 | 0.66 | 0.20 | 0.14 |
| 67 | 27.96 | 18.55 | 5.46 | 3.95 | 0.66 | 0.20 | 0.14 |
| 68 | 27.57 | 18.27 | 5.42 | 3.88 | 0.66 | 0.20 | 0.14 |
| 69 | 26.08 | 17.33 | 5.11 | 3.64 | 0.66 | 0.20 | 0.14 |
| 70 | 25.7 | 17.06 | 5.07 | 3.57 | 0.66 | 0.20 | 0.14 |
| 71 | 24.23 | 16.13 | 4.76 | 3.33 | 0.67 | 0.20 | 0.14 |
| 72 | 23.86 | 15.87 | 4.72 | 3.27 | 0.67 | 0.20 | 0.14 |
| 73 | 22.39 | 14.95 | 4.41 | 3.03 | 0.67 | 0.20 | 0.14 |
| 74 | 22.04 | 14.7 | 4.37 | 2.97 | 0.67 | 0.20 | 0.13 |
| 75 | 20.58 | 13.78 | 4.06 | 2.74 | 0.67 | 0.20 | 0.13 |
| 76 | 20.24 | 13.55 | 4.02 | 2.68 | 0.67 | 0.20 | 0.13 |
| 77 | 18.79 | 12.64 | 3.71 | 2.45 | 0.67 | 0.20 | 0.13 |
| 78 | 18.47 | 12.41 | 3.67 | 2.40 | 0.67 | 0.20 | 0.13 |
| 79 | 17.02 | 11.51 | 3.35 | 2.16 | 0.68 | 0.20 | 0.13 |
| 80 | 16.73 | 11.30 | 3.31 | 2.12 | 0.68 | 0.20 | 0.13 |
| 81 | 15.28 | 10.40 | 3.00 | 1.89 | 0.68 | 0.20 | 0.12 |
| 82 | 15.01 | 10.21 | 2.96 | 1.84 | 0.68 | 0.20 | 0.12 |
| 83 | 13.57 | 9.31 | 2.64 | 1.61 | 0.69 | 0.19 | 0.12 |
| 84 | 13.32 | 9.14 | 2.61 | 1.58 | 0.69 | 0.2 | 0.12 |
| 85 | 11.88 | 8.24 | 2.29 | 1.35 | 0.69 | 0.19 | 0.11 |
| 86 | 11.66 | 8.09 | 2.26 | 1.32 | 0.69 | 0.19 | 0.11 |
| 87 | 10.22 | 7.19 | 1.93 | 1.09 | 0.70 | 0.19 | 0.11 |
| 88 | 10.03 | 7.05 | 1.91 | 1.07 | 0.70 | 0.19 | 0.11 |
| 89 | 8.57 | 6.15 | 1.58 | 0.84 | 0.71 | 0.18 | 0.10 |
| 90 | 8.42 | 6.04 | 1.56 | 0.83 | 0.71 | 0.18 | 0.10 |

LE, life expectancy, DFLE, depression-free life expectancy, MDLE, mild-depression life expectancy, SDLE, moderate-to-severe depression life expectancy.

## 3.6 Table S6. Life expectancy and state-specific life expectancy among individuals with a starting age of 60 years in the HRS analysis, stratified by sex.

| **Table S6.** Life expectancy and state-specific life expectancy among individuals with a starting age of 60 years in the HRS analysis, stratified by sex. | | | | | | | | | |
| --- | --- | --- | --- | --- | --- | --- | --- | --- | --- |
| Age | Female |  |  |  |  | Male |  |  |  |
| LE (year) | DFLE (year) | MDLE (year) | SDLE (year) |  | LE (year) | DFLE (year) | MDLE (year) | SDLE (year) |
| 60 | 35.72 | 22.67 | 7.25 | 5.80 |  | 34.13 | 24.26 | 5.93 | 3.94 |
| 61 | 34.17 | 21.73 | 6.92 | 5.52 |  | 32.72 | 23.29 | 5.68 | 3.76 |
| 62 | 33.79 | 21.46 | 6.89 | 5.44 |  | 32.23 | 22.92 | 5.63 | 3.69 |
| 63 | 32.24 | 20.52 | 6.57 | 5.16 |  | 30.83 | 21.95 | 5.37 | 3.50 |
| 64 | 31.87 | 20.25 | 6.53 | 5.09 |  | 30.34 | 21.59 | 5.32 | 3.43 |
| 65 | 30.33 | 19.32 | 6.21 | 4.81 |  | 28.95 | 20.63 | 5.07 | 3.25 |
| 66 | 29.97 | 19.06 | 6.17 | 4.73 |  | 28.47 | 20.28 | 5.01 | 3.18 |
| 67 | 28.43 | 18.13 | 5.84 | 4.46 |  | 27.08 | 19.32 | 4.75 | 3.00 |
| 68 | 28.07 | 17.88 | 5.81 | 4.39 |  | 26.62 | 18.98 | 4.70 | 2.94 |
| 69 | 26.54 | 16.96 | 5.47 | 4.11 |  | 25.24 | 18.03 | 4.44 | 2.76 |
| 70 | 26.2 | 16.72 | 5.44 | 4.04 |  | 24.79 | 17.70 | 4.39 | 2.7 |
| 71 | 24.67 | 15.79 | 5.11 | 3.77 |  | 23.41 | 16.76 | 4.13 | 2.52 |
| 72 | 24.34 | 15.56 | 5.07 | 3.71 |  | 22.98 | 16.44 | 4.07 | 2.46 |
| 73 | 22.81 | 14.65 | 4.73 | 3.43 |  | 21.61 | 15.51 | 3.81 | 2.29 |
| 74 | 22.5 | 14.43 | 4.70 | 3.37 |  | 21.2 | 15.2 | 3.76 | 2.23 |
| 75 | 20.98 | 13.52 | 4.36 | 3.10 |  | 19.84 | 14.28 | 3.5 | 2.06 |
| 76 | 20.68 | 13.31 | 4.32 | 3.05 |  | 19.44 | 13.99 | 3.45 | 2.00 |
| 77 | 19.16 | 12.40 | 3.99 | 2.78 |  | 18.09 | 13.07 | 3.19 | 1.83 |
| 78 | 18.88 | 12.20 | 3.95 | 2.72 |  | 17.72 | 12.80 | 3.14 | 1.78 |
| 79 | 17.37 | 11.30 | 3.61 | 2.46 |  | 16.37 | 11.89 | 2.87 | 1.61 |
| 80 | 17.1 | 11.12 | 3.58 | 2.41 |  | 16.03 | 11.63 | 2.83 | 1.57 |
| 81 | 15.6 | 10.22 | 3.23 | 2.15 |  | 14.69 | 10.73 | 2.56 | 1.40 |
| 82 | 15.36 | 10.05 | 3.20 | 2.10 |  | 14.37 | 10.49 | 2.52 | 1.36 |
| 83 | 13.85 | 9.16 | 2.85 | 1.84 |  | 13.04 | 9.59 | 2.25 | 1.20 |
| 84 | 13.63 | 9.01 | 2.83 | 1.80 |  | 12.75 | 9.38 | 2.21 | 1.16 |
| 85 | 12.13 | 8.11 | 2.48 | 1.54 |  | 11.42 | 8.48 | 1.94 | 1.00 |
| 86 | 11.93 | 7.98 | 2.45 | 1.51 |  | 11.16 | 8.29 | 1.91 | 0.97 |
| 87 | 10.43 | 7.08 | 2.10 | 1.25 |  | 9.82 | 7.39 | 1.63 | 0.81 |
| 88 | 10.26 | 6.96 | 2.07 | 1.22 |  | 9.61 | 7.22 | 1.60 | 0.78 |
| 89 | 8.74 | 6.06 | 1.71 | 0.96 |  | 8.26 | 6.31 | 1.33 | 0.62 |
| 90 | 8.6 | 5.96 | 1.70 | 0.94 |  | 8.08 | 6.17 | 1.30 | 0.60 |

## 3.7 Table S7. Life expectancy and state-specific life expectancy among individuals with a starting age of 60 years in the HRS analysis, stratified by education.

| **Table S7.** Life expectancy and state-specific life expectancy among individuals with a starting age of 60 years in the HRS analysis, stratified by education. | | | | | | | | | |
| --- | --- | --- | --- | --- | --- | --- | --- | --- | --- |
| Age | Lower education | |  |  |  | Higher education | |  |  |
| LE (year) | DFLE (year) | MDLE (year) | SDLE (year) |  | LE (year) | DFLE (year) | MDLE (year) | SDLE (year) |
| 60 | 33.86 | 17.84 | 8.13 | 7.89 |  | 35.48 | 24.51 | 6.47 | 4.5 |
| 61 | 32.46 | 17.15 | 7.80 | 7.51 |  | 33.95 | 23.49 | 6.18 | 4.28 |
| 62 | 31.97 | 16.88 | 7.72 | 7.37 |  | 33.55 | 23.18 | 6.15 | 4.22 |
| 63 | 30.58 | 16.20 | 7.38 | 7.00 |  | 32.03 | 22.16 | 5.86 | 4.01 |
| 64 | 30.11 | 15.93 | 7.31 | 6.87 |  | 31.63 | 21.86 | 5.82 | 3.95 |
| 65 | 28.72 | 15.26 | 6.97 | 6.50 |  | 30.11 | 20.85 | 5.53 | 3.73 |
| 66 | 28.26 | 15.00 | 6.89 | 6.37 |  | 29.73 | 20.55 | 5.50 | 3.67 |
| 67 | 26.88 | 14.33 | 6.55 | 6.00 |  | 28.21 | 19.55 | 5.20 | 3.46 |
| 68 | 26.43 | 14.07 | 6.48 | 5.88 |  | 27.84 | 19.26 | 5.17 | 3.41 |
| 69 | 25.06 | 13.41 | 6.13 | 5.52 |  | 26.33 | 18.27 | 4.87 | 3.19 |
| 70 | 24.62 | 13.17 | 6.06 | 5.40 |  | 25.96 | 17.99 | 4.84 | 3.14 |
| 71 | 23.26 | 12.50 | 5.71 | 5.04 |  | 24.46 | 17.00 | 4.54 | 2.93 |
| 72 | 22.84 | 12.27 | 5.64 | 4.93 |  | 24.11 | 16.73 | 4.5 | 2.88 |
| 73 | 21.48 | 11.61 | 5.29 | 4.57 |  | 22.61 | 15.74 | 4.20 | 2.66 |
| 74 | 21.08 | 11.39 | 5.22 | 4.47 |  | 22.27 | 15.49 | 4.17 | 2.62 |
| 75 | 19.73 | 10.74 | 4.87 | 4.12 |  | 20.78 | 14.51 | 3.87 | 2.41 |
| 76 | 19.35 | 10.53 | 4.80 | 4.02 |  | 20.46 | 14.26 | 3.83 | 2.36 |
| 77 | 18.01 | 9.88 | 4.45 | 3.67 |  | 18.97 | 13.29 | 3.53 | 2.15 |
| 78 | 17.65 | 9.68 | 4.39 | 3.58 |  | 18.67 | 13.06 | 3.49 | 2.11 |
| 79 | 16.31 | 9.04 | 4.03 | 3.24 |  | 17.19 | 12.10 | 3.19 | 1.91 |
| 80 | 15.98 | 8.85 | 3.97 | 3.15 |  | 16.91 | 11.88 | 3.16 | 1.87 |
| 81 | 14.65 | 8.21 | 3.62 | 2.82 |  | 15.43 | 10.92 | 2.85 | 1.66 |
| 82 | 14.34 | 8.04 | 3.56 | 2.74 |  | 15.17 | 10.72 | 2.82 | 1.63 |
| 83 | 13.01 | 7.40 | 3.20 | 2.41 |  | 13.70 | 9.76 | 2.51 | 1.43 |
| 84 | 12.74 | 7.25 | 3.15 | 2.34 |  | 13.46 | 9.59 | 2.48 | 1.40 |
| 85 | 11.41 | 6.61 | 2.79 | 2.01 |  | 11.99 | 8.63 | 2.17 | 1.19 |
| 86 | 11.16 | 6.47 | 2.74 | 1.96 |  | 11.78 | 8.47 | 2.15 | 1.17 |
| 87 | 9.83 | 5.83 | 2.37 | 1.63 |  | 10.31 | 7.51 | 1.83 | 0.97 |
| 88 | 9.62 | 5.70 | 2.33 | 1.58 |  | 10.13 | 7.38 | 1.81 | 0.95 |
| 89 | 8.26 | 5.05 | 1.96 | 1.26 |  | 8.64 | 6.41 | 1.49 | 0.75 |
| 90 | 8.09 | 4.95 | 1.92 | 1.22 |  | 8.50 | 6.29 | 1.47 | 0.73 |

## 3.8 Table S8. Total life expectancy and state-specific life expectancy at age 60 by baseline depression status in the HRS sensitivity analysis.

| **Table S8.** Total life expectancy and state-specific life expectancy at age 60 by baseline depression status in the HRS sensitivity analysis. | | | | | | | |
| --- | --- | --- | --- | --- | --- | --- | --- |
| Health State | LE(year) | DFLE(year) | MDLE(year) | SDLE(year) | DFLE/LE | MDLE/LE | SDLE/LE |
| No depression | 36.155 | 23.62 | 7.127 | 5.409 | 0.65 | 0.2 | 0.15 |
| Mild depression | 36.047 | 21.221 | 8.68 | 6.147 | 0.59 | 0.24 | 0.17 |
| Moderate-to-severe depression | 35.951 | 19.897 | 7.579 | 8.475 | 0.55 | 0.21 | 0.24 |

## 3.9 Table S9. Life expectancy and state-specific life expectancy among individuals with a starting age of 60 years in the HRS sensitivity analysis.

| **Table S9.** Life expectancy and state-specific life expectancy among individuals with a starting age of 60 years in the HRS sensitivity analysis. | | | | | | | |
| --- | --- | --- | --- | --- | --- | --- | --- |
| Age | LE (year) | DFLE (year) | MDLE (year) | SDLE (year) | DFLE/LE | MDLE/LE | SDLE/LE |
| 60 | 36.16 | 23.62 | 7.13 | 5.41 | 0.65 | 0.2 | 0.15 |
| 61 | 34.56 | 22.61 | 6.8 | 5.14 | 0.65 | 0.2 | 0.15 |
| 62 | 34.22 | 22.35 | 6.79 | 5.08 | 0.65 | 0.2 | 0.15 |
| 63 | 32.63 | 21.35 | 6.46 | 4.81 | 0.65 | 0.2 | 0.15 |
| 64 | 32.3 | 21.1 | 6.45 | 4.75 | 0.65 | 0.2 | 0.15 |
| 65 | 30.71 | 20.1 | 6.12 | 4.48 | 0.65 | 0.2 | 0.15 |
| 66 | 30.39 | 19.86 | 6.11 | 4.42 | 0.65 | 0.2 | 0.15 |
| 67 | 28.8 | 18.87 | 5.78 | 4.16 | 0.66 | 0.2 | 0.14 |
| 68 | 28.49 | 18.63 | 5.76 | 4.1 | 0.66 | 0.2 | 0.14 |
| 69 | 26.91 | 17.64 | 5.43 | 3.84 | 0.66 | 0.2 | 0.14 |
| 70 | 26.61 | 17.41 | 5.41 | 3.78 | 0.66 | 0.2 | 0.14 |
| 71 | 25.03 | 16.43 | 5.07 | 3.52 | 0.66 | 0.2 | 0.14 |
| 72 | 24.74 | 16.21 | 5.05 | 3.47 | 0.66 | 0.2 | 0.14 |
| 73 | 23.16 | 15.24 | 4.71 | 3.21 | 0.66 | 0.2 | 0.14 |
| 74 | 22.89 | 15.03 | 4.69 | 3.16 | 0.65 | 0.21 | 0.14 |
| 75 | 21.32 | 14.06 | 4.35 | 2.9 | 0.66 | 0.2 | 0.14 |
| 76 | 21.06 | 13.87 | 4.33 | 2.86 | 0.65 | 0.21 | 0.14 |
| 77 | 19.49 | 12.91 | 3.99 | 2.6 | 0.66 | 0.21 | 0.13 |
| 78 | 19.25 | 12.72 | 3.97 | 2.56 | 0.66 | 0.21 | 0.13 |
| 79 | 17.68 | 11.76 | 3.62 | 2.3 | 0.67 | 0.2 | 0.13 |
| 80 | 17.46 | 11.59 | 3.6 | 2.27 | 0.66 | 0.21 | 0.13 |
| 81 | 15.9 | 10.64 | 3.25 | 2.01 | 0.67 | 0.2 | 0.13 |
| 82 | 15.69 | 10.48 | 3.23 | 1.98 | 0.67 | 0.21 | 0.12 |
| 83 | 14.13 | 9.53 | 2.87 | 1.72 | 0.67 | 0.2 | 0.13 |
| 84 | 13.94 | 9.39 | 2.86 | 1.69 | 0.67 | 0.2 | 0.13 |
| 85 | 12.38 | 8.44 | 2.5 | 1.44 | 0.68 | 0.2 | 0.12 |
| 86 | 12.22 | 8.32 | 2.48 | 1.42 | 0.68 | 0.2 | 0.12 |
| 87 | 10.65 | 7.36 | 2.11 | 1.17 | 0.69 | 0.2 | 0.11 |
| 88 | 10.51 | 7.26 | 2.1 | 1.15 | 0.69 | 0.2 | 0.11 |
| 89 | 8.93 | 6.3 | 1.73 | 0.9 | 0.7 | 0.19 | 0.1 |
| 90 | 8.82 | 6.21 | 1.72 | 0.89 | 0.7 | 0.2 | 0.1 |

## 3.10 Figure S1. Transition probability plot of depression-related health states among older adults with arthritis in the HRS population.


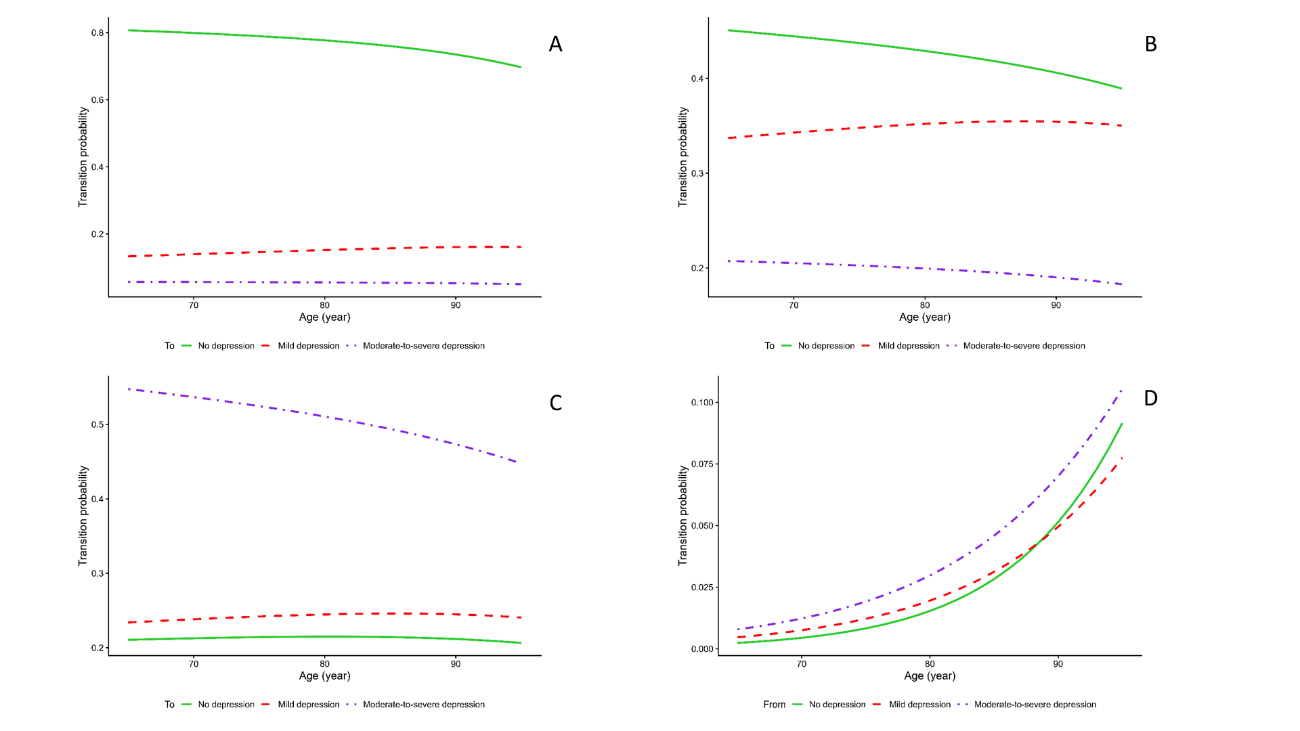


**Figure S1.** Transition probability plot of depression-related health states among older adults with arthritis in the HRS population. Panels A–C present the probabilities of transitioning from baseline no depression (A), mild depression (B), and moderate-to-severe depression (C)states to each depression-related health state, respectively. Panel D presents the probabilities of transitioning from each depression-related health state to death.

## 3.11 Figure S2. Composition of state-specific life expectancy among older adults with arthritis in the HRS analysis, stratified by sex and educational level.


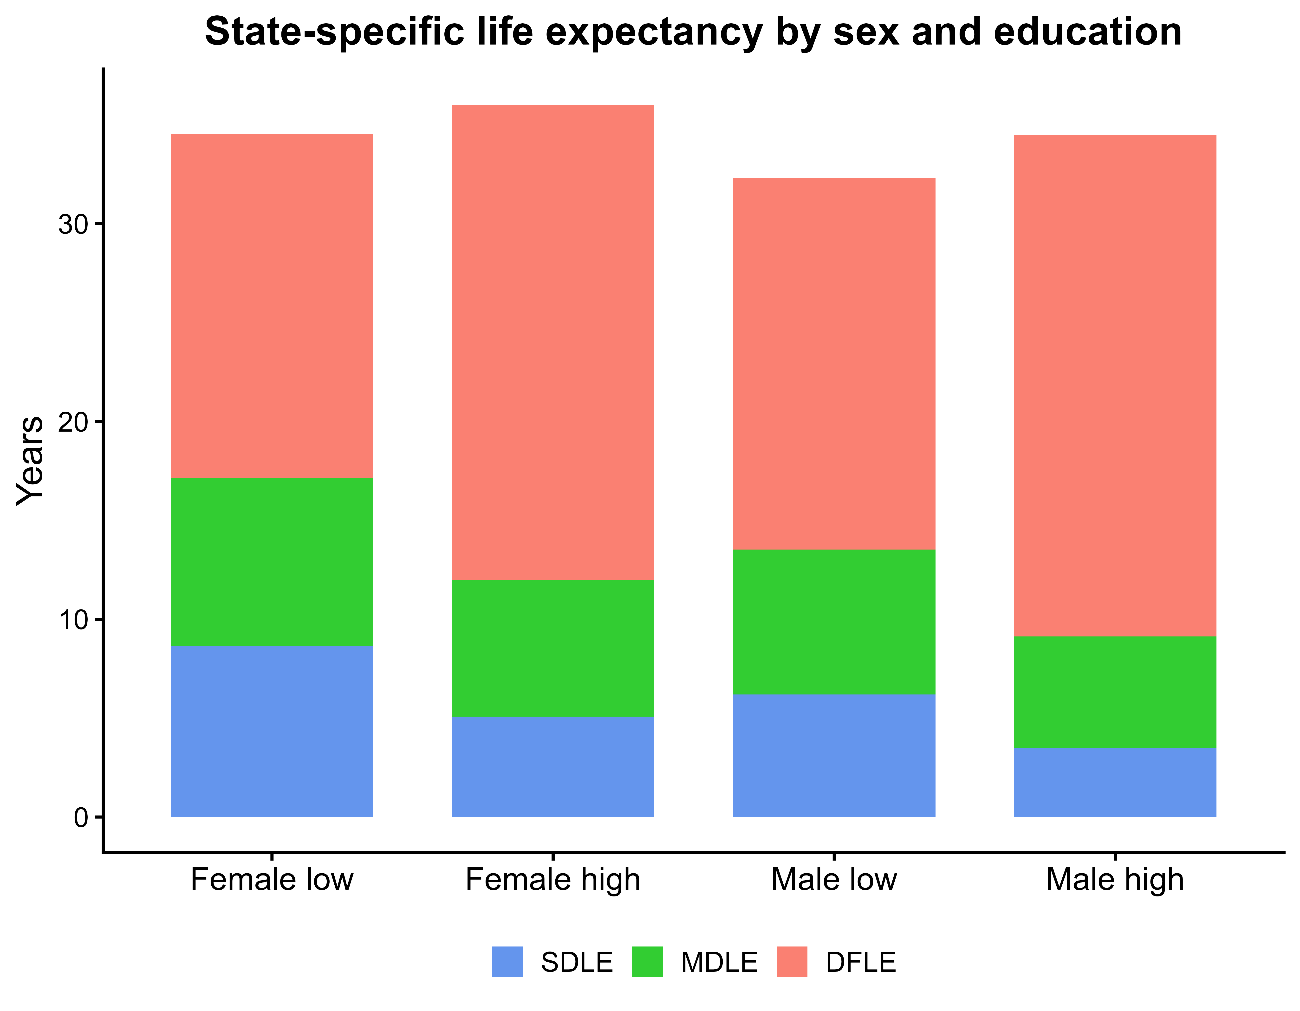


**Figure S2.** Composition of state-specific life expectancy among older adults with arthritis in the HRS population, stratified jointly by sex and educational level. LE, life expectancy, DFLE, depression-free life expectancy, MDLE, mild-depression life expectancy, SDLE, moderate-to-severe depression life expectancy.
